# Supplementary material for: RNase Z Oxidative Degradation Impedes tRNA Maturation and is Involved in Streptococcal Translation Regulation in Response to Oxidative Stress
Source: PubMed Central journal article supplement (PMC8549757; doi:10.1128/spectrum.01167-21), 2021-10-27
Supplement: spectrum01167-21_supp_1_seq9.pdf [file spectrum01167-21_supp_1_seq9.pdf]

1 **Supplementary Information for**  
2 **RNase Z oxidative degradation impedes tRNA maturation and is involved in**  
3 **streptococcal translation regulation in response to oxidative stress**

4 Yuzhu Dong<sup>a,b,1</sup>, Huichun Tong<sup>a,b,1,\*</sup>, Qingqing Hu<sup>a,b</sup>, Xiuzhu Dong<sup>a,b,\*</sup>

5 <sup>a</sup>State Key Laboratory of Microbial Resources, Institute of Microbiology, Chinese  
6 Academy of Sciences, Beijing 100101, China

7 <sup>b</sup>University of Chinese Academy of Sciences, Beijing 100049, China

8

9

10

11 **This file contains:**

12 Figures S1 to S11

13 Table S1

14

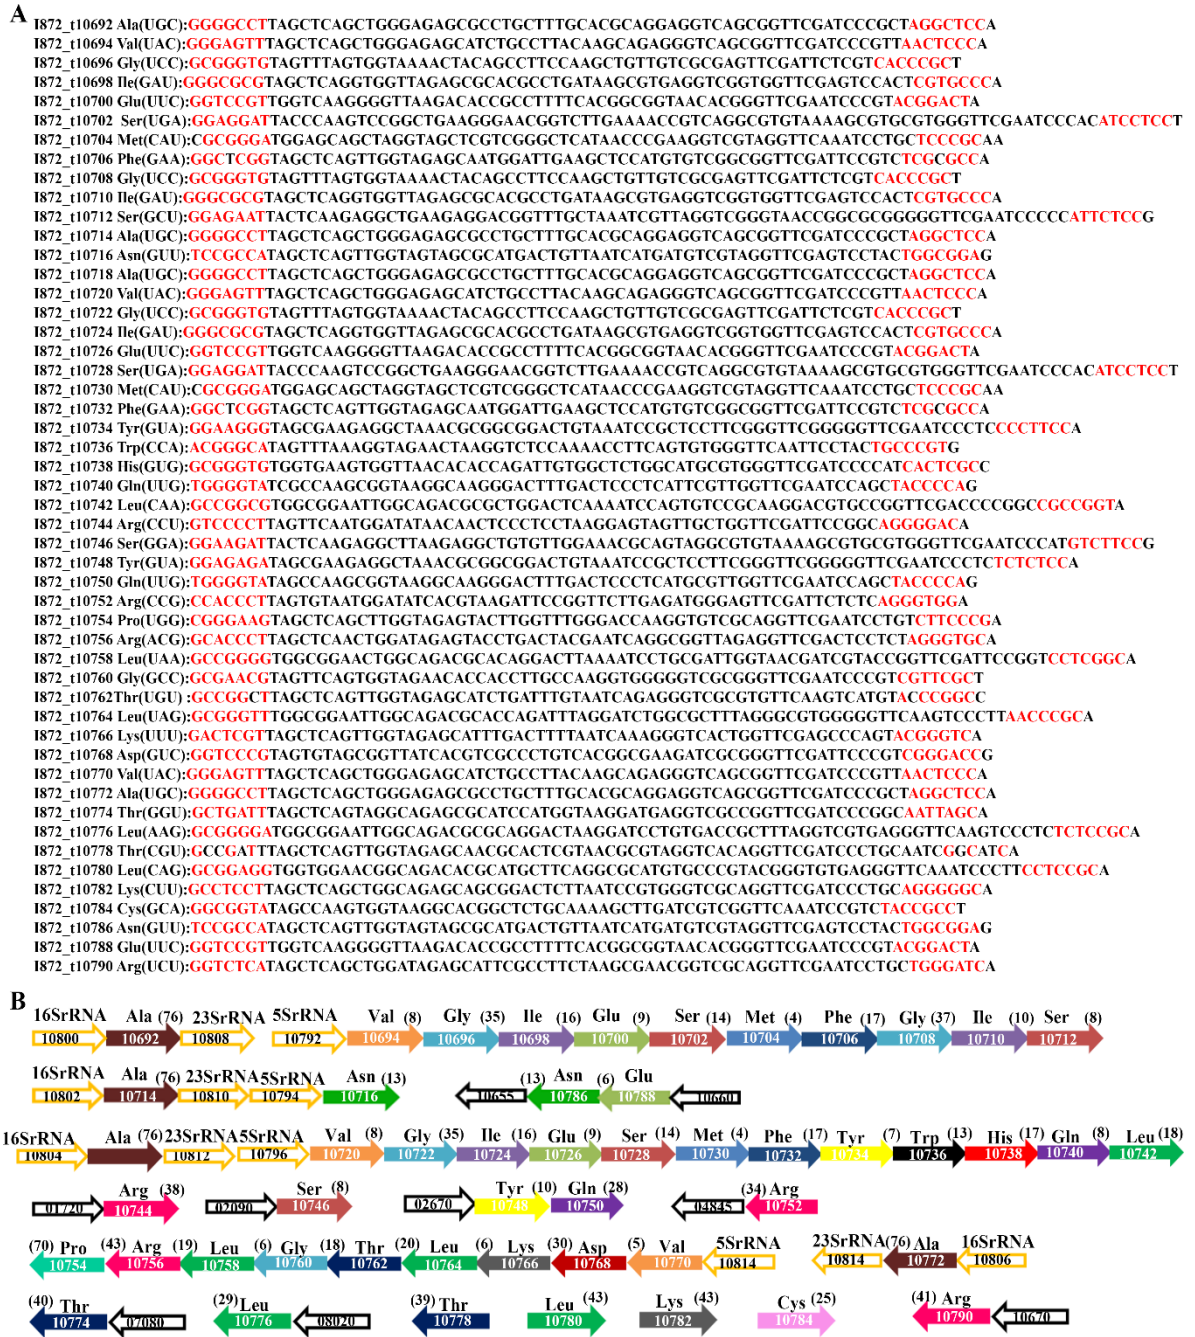

15

16 Fig. S1. Sequences (A) and the genomic organizations (B) of the 50 *S.*

17 *oligofermentans* tRNA genes. A. Sequences of the 50 tRNA genes of *S.*

18 *oligofermentans* are retrieved from KEGG database, and the accession numbers and

19 amino acid trigrams are provided. Nucleotides in parentheses are the anticodons and

20 those in red are reversely complemented to form the acceptor stem. The last one in each

21 sequence is the discriminator nucleotide. B. Schematics show the genomic  
22 organizations of the *S. oligofermentans* tRNA genes (solid bullets) with other genes  
23 (empty bullets). The amino acid trigram represents its carrier tRNA gene with the  
24 accession numbers shown. Number inside parenthesis at the 3' end of each tRNA gene  
25 represents the 3' trailer length of the tRNA precursor. The tRNA genes shown in the  
26 same colored bullets carry the same amino acid.

27

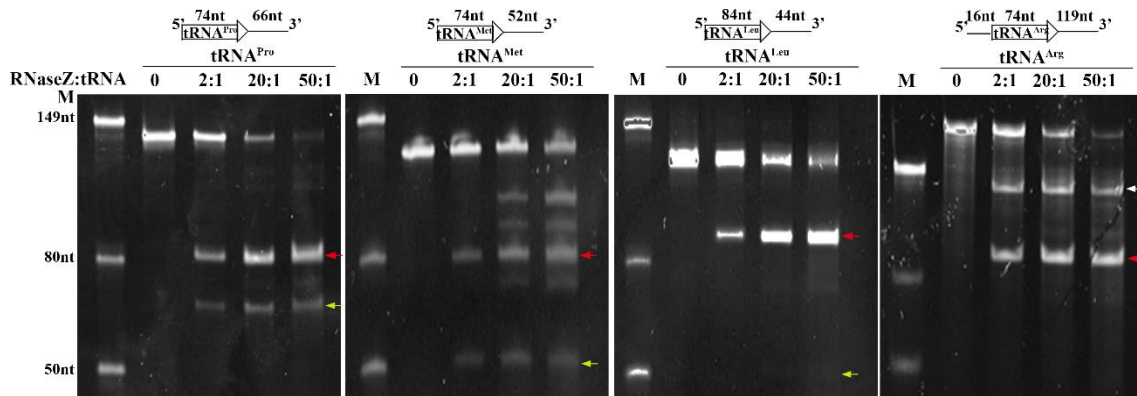

28

29 **Fig. S2. Urea-PAGE analysis of So-RNaseZ cleaving four tRNA precursors.** The  
 30 140 nt tRNA<sup>Pro</sup> (I872\_t10754), 126 nt tRNA<sup>Met</sup> (I872\_10730), 128 nt tRNA<sup>Leu</sup>  
 31 (I872\_t10780) and 209 nt tRNA<sup>Arg</sup> (I872\_t10790) precursor fragments were obtained  
 32 by *in vitro* transcription, and 50 ng of each tRNA precursor was used as the nucleolytic  
 33 substrates. Nucleolytic assay was initiated by addition of So-RNaseZ protein in a  
 34 gradient increased molar ratio as indicated, and incubated at 37°C for 30 min as  
 35 described in “Materials and Methods”. Nucleolytic products were separated on 10%  
 36 Urea PAGE gel. Schematics at top show the lengths of 5' extension, tRNA gene and 3'  
 37 trailer in each tRNA precursor. Red and yellow arrows indicate the cleaving products  
 38 comprising of tRNA gene or 5' extension and tRNA gene for tRNA<sup>Arg</sup> precursor, and  
 39 3' trailer, respectively. M, RNA molecular weight marker is shown at the left.



48 and then subject to LC-MS/MS identification. The upper panel shows the LC-MS/MS  
49 spectrum of a 4-charged peptide fragment with the precursor mass of 3468.7258 that  
50 was identified as Cys149-Cys149 linked peptide as shown in insert. The lower panel  
51 shows the LC-MS/MS spectrum of a 6-charged peptide fragment with precursor mass  
52 of 4766.3212 that was identified as an intra-molecular Cys38-Cys149 linked peptide  
53 (insert).  
54

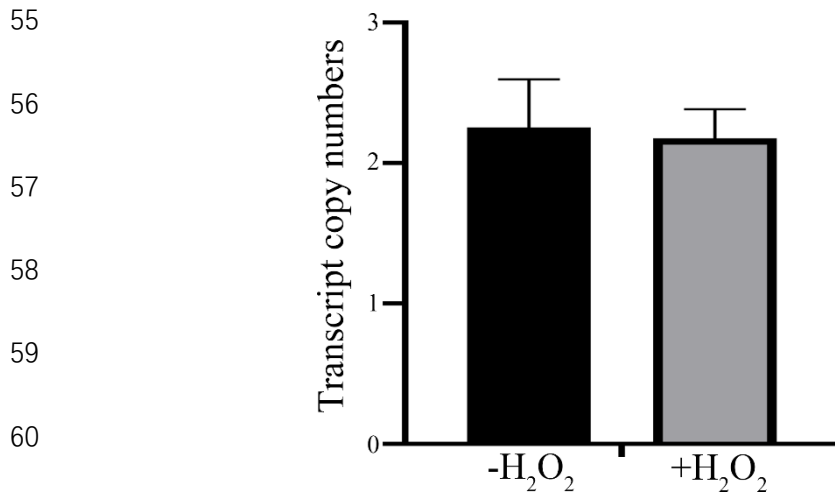

62 **Fig. S4. qPCR determines the *So-rnaseZ* transcript levels in anaerobically grown**  
63 ***S. oligofermentans* treated (+) with or without (-) H<sub>2</sub>O<sub>2</sub>.** Total RNAs were extracted  
64 from the mid-exponential cells using TRIzol reagent. After quality confirmation on 1%  
65 agarose gel, cDNAs were generated from 2 µg of total RNA with random primers using  
66 Moloney murine leukemia virus reverse transcriptase, and then qPCR was implemented.  
67 Experiments were repeated three times on triplicate samples. Transcript copies were  
68 calculated as per 1000 16S rRNA copies, and the averages ± SD of three independent  
69 experiments are shown.

70

71  
72  
73  
74  
75  
76  
77  
78  
79  
80  
81  
82  
83  
84  
85  
86  
87  
88

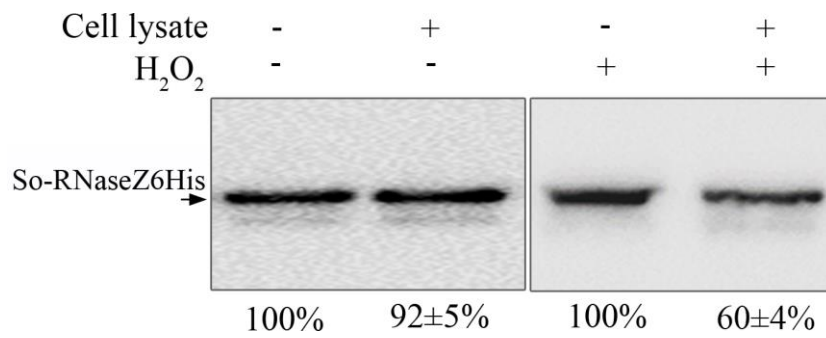

**Fig. S5. Determination of H<sub>2</sub>O<sub>2</sub> oxidized So-RNaseZ degradation by the *S. oligofermentans* cell lysate.** The recombinant So-RNaseZ6His protein (10 μg) was first reduced with 10 mM DTT at 37°C for 1 h, and then super-filtrated to remove DTT. An aliquot of So-RNaseZ protein was treated with 500 μM H<sub>2</sub>O<sub>2</sub> for 30 min, and leaving another aliquot untreated as a control. After 30 min co-incubation with or without the cell lysate of *S. oligofermentans* at 37°C, So-RNaseZ6His protein was run on 12% SDS-PAGE gel and the abundance was determined by western blot using the anti-His antibody. Band intensities were measured using Image J, and expressed as the percentiles of the protein treated with and without H<sub>2</sub>O<sub>2</sub> among their respective abundance in non-cell lysate treatments. Experiments were repeated three times, and the averages ± SD of three experiments are shown beneath the representative gel.



89  
90  
91  
92  
93  
94  
95  
96  
97  
98  
99  
100  
101  
102  
103  
104  
105  
106  
107  
108  
109  
110

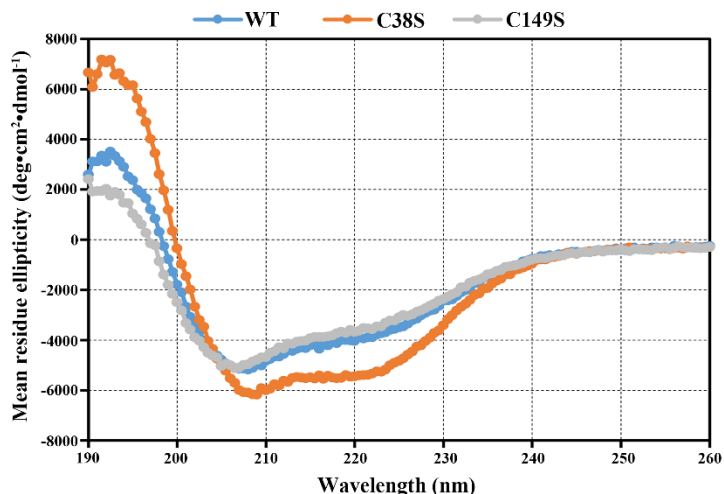

|       | Helix1 | Helix2 | Strand1 | Strand2 | Turns | Unordered | Total |
|-------|--------|--------|---------|---------|-------|-----------|-------|
| WT    | 0.037  | 0.097  | 0.204   | 0.124   | 0.131 | 0.408     | 1.001 |
| C38S  | 0.065  | 0.102  | 0.198   | 0.117   | 0.128 | 0.390     | 1     |
| C149S | 0.031  | 0.096  | 0.203   | 0.124   | 0.132 | 0.414     | 1     |

**Fig. S6. Circular dichroism (CD) spectra of the wild-type and cysteine mutated So-RNaseZ.** The So-RNaseZ6His (WT) Cys38 and Cys149 were each mutated into serine to construct So-RNaseZC38S6His (C38S) and So-RNaseZC149S6His (C149S), respectively. The three proteins were diluted into 200  $\mu$ l CD buffer (10 mM  $K_3PO_4$ , 100 mM NaF, pH 7.5) to make a final concentration of 5  $\mu$ M. CD spectra were collected in 0.1 cm quartz cuvettes from wave length of 190 to 260 nm at 0.5 nm interval with a 60 nm/min scan rate at Chirascan circular dichroism spectrometer (Applied photophysics Ltd) under a constant nitrogen purge. Data were acquired at 25  $^{\circ}$ C, and processed using the pro-Data Viewer 4.2.15 (Spectra Manager software) (Jasco, USA). Each spectrum represents the average of three scans of a sample. Protein secondary structures were analyzed via website Dichroweb (<http://dichroweb.cryst.bbk.ac.uk>), the output results were shown below the figure.

111

112

113

114

115

116

117

118

119

120

121

122

123

124

125

126

127

128

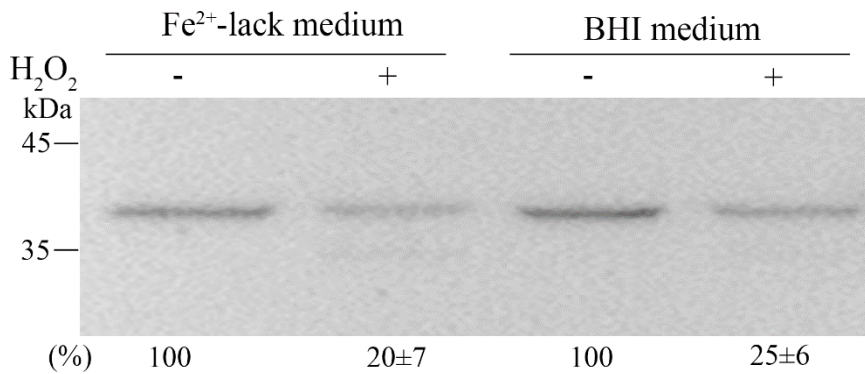

**Fig. S7. Assay of H<sub>2</sub>O<sub>2</sub> or Fenton chemistry-generated hydroxyl radical caused the**

**cellular So-RNaseZ degradation.** The *S. oligofermentans* RNaseZ-6His strain was

anaerobically grown in Fe<sup>2+</sup>-lack chemically defined FMC medium and BHI broth,

respectively. Until OD<sub>600</sub> of ~ 0.3-0.4, an aliquot of the culture was 30 min treated with

500 μM H<sub>2</sub>O<sub>2</sub>, and leaving another aliquot untreated. Cells were then sonicated and the

lysates were run on 12% SDS-PAGE gels. The cellular So-RNaseZ abundance was

examined by western blot using anti-His antibody. Band intensities were measured

using Image J, and expressed as the percentiles of the So-RNaseZ protein in the

bacterium grown in the corresponding medium not treated with H<sub>2</sub>O<sub>2</sub>. Molecular weight

marker is shown at the left. Experiments were repeated three times, and the averages ±

SD of three experiments are shown beneath the representative gel.

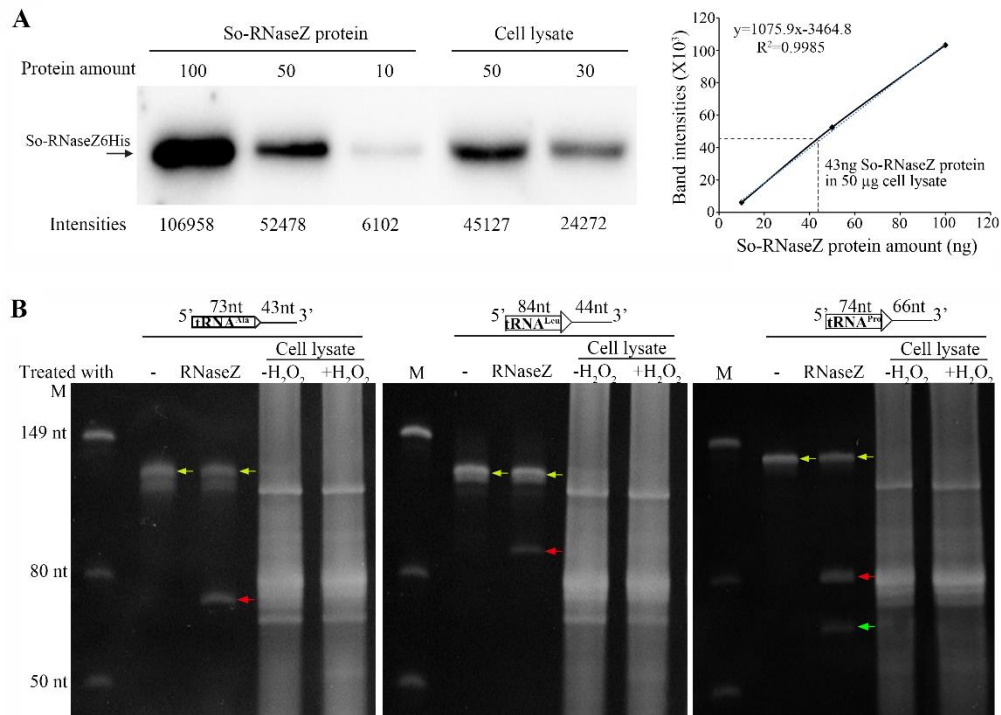

130

131 **Fig. S8. Determination of tRNA precursor degradation by *S. oligofermentans* cell**132 **lysates.** A. Western blot assayed the cellular So-RNaseZ protein content. Various133 amounts of purified So-RNaseZ protein (ng) and cell lysates ( $\mu$ g) of the RNaseZ-6His

134 strain were run on 12% SDS-PAGE gel and So-RNaseZ protein was detected using

135 anti-His antibody (left panel). Band intensities were measured using Image J. Band

136 intensities of purified So-RNaseZ protein were plotted against So-RNaseZ protein

137 amount (right panel). Referenced to the linear regression equation, 43 ng of So-RNaseZ

138 protein was calculated in 50  $\mu$ g cell lysate. B. The 116 nt tRNA<sup>Ala</sup> (I872\_t10692), 128139 nt tRNA<sup>Leu</sup> (I872\_t10780) and 140 nt tRNA<sup>Pro</sup> (I872\_t10754) precursor fragments were140 obtained by *in vitro* transcription. Four aliquots of 50 ng of each tRNA precursor

141 were prepared; one aliquot was untreated as a control, two aliquots were incubated with 10

142  $\mu\text{g}$  cell lysate of anaerobically cultured *S. oligofermentans* that were 30 min treated  
143 with (+H<sub>2</sub>O<sub>2</sub>) or without 0.5 mM H<sub>2</sub>O<sub>2</sub> (-H<sub>2</sub>O<sub>2</sub>), respectively, and the other one was  
144 incubated with 15 ng So-RNaseZ protein (RNaseZ), by referenced to the So-RNaseZ  
145 abundance in 10  $\mu\text{g}$  cell lysate estimated in A. After 30 min incubation, the samples  
146 were separated on 10% Urea PAGE gel and stained with SYBR Gold Nucleic Acid Gel  
147 Stain. Schematics at top show the lengths of the tRNA gene and 3' trailer in each  
148 precursor. Yellow arrow indicates the tRNA precursors, red and green arrows indicate  
149 the cleaving products comprising of tRNA gene and 3' trailer, respectively. M, RNA  
150 molecular weight marker with length shown at the gel left.

151

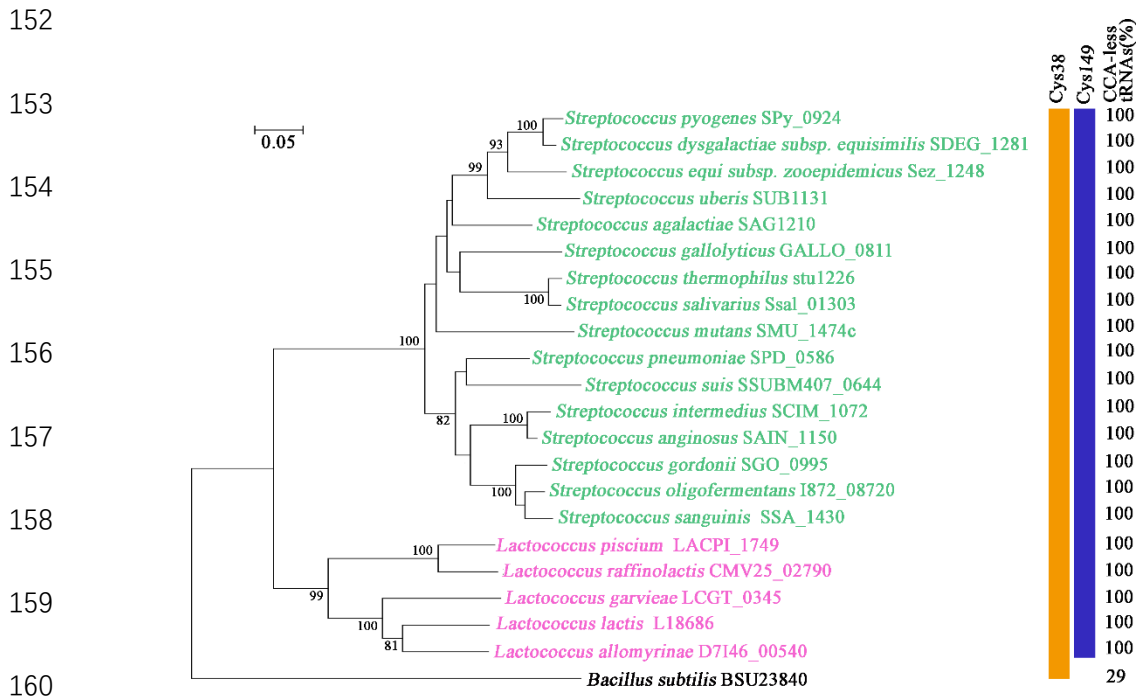

161 **Fig. S9. Phylogenetic analysis of the So-RNaseZ orthologs and its Cys38/Cys149 in**  
 162 **Streptococcaceae that encode CCA-less tRNAs.** Sequences of So-RNaseZ protein  
 163 and its orthologs from all species of Streptococcaceae were obtained from KEGG  
 164 database, and aligned using ClustalW. The phylogenetic tree was constructed using the  
 165 Neighbor-joining method with bootstrap values of 1000 replicates. The bar of 0.05  
 166 represents the evolution distance. Orange and blue bars at right indicate the presence of  
 167 Cys38 and Cys149 in the RNase Z orthologs, respectively; and numbers represent the  
 168 percentiles of CCA-less tRNAs in the respective species.

169

170

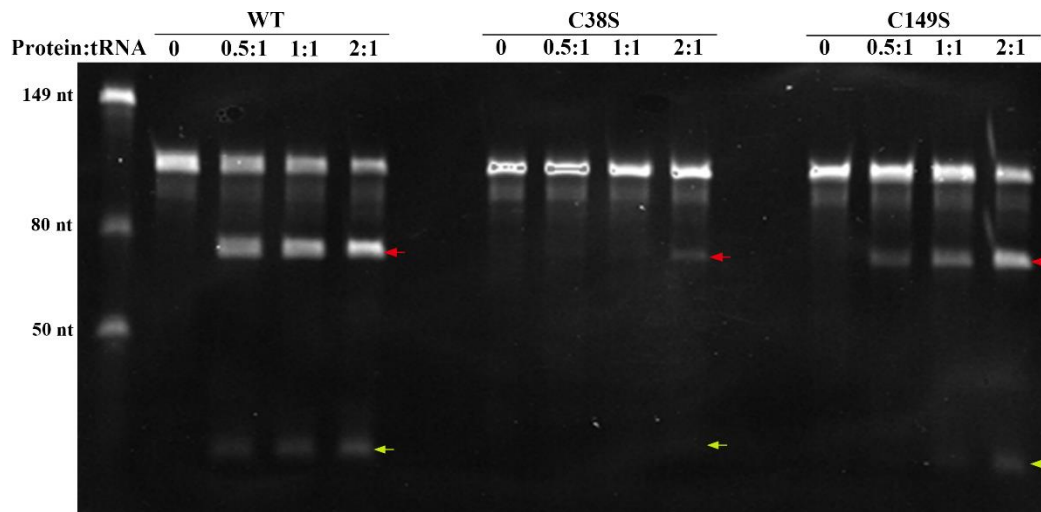

171

172 **Fig. S10. Comparison of the wild-type and cysteine mutated So-RNaseZ activities.**

173 The 104 nt tRNA<sup>Arg</sup> (I872\_t10790) precursor fragment, comprising of 74 nt mature

174 tRNA<sup>Arg</sup> and 30 nt 3' trailer, was obtained by *in vitro* transcription, and 50 ng was used

175 as the nucleolytic substrates. Nucleolytic assay was initiated by addition of a gradient

176 of increasing molar ratio of wild-type So-RNaseZ6His protein (WT) and Cys38 and

177 Cys149 serine substituted So-RNaseZC38S6His (C38S) and So-RNaseZC149S6His

178 (C149S), respectively, and incubated at 37°C for 30 min as described in “Materials and

179 Methods”. Nucleolytic products were separated on 10% Urea PAGE gel. Red and

180 yellow arrows indicate the cleaving products of mature tRNA gene and 3' trailer,

181 respectively. RNA molecular weight marker is shown at the gel left.

182

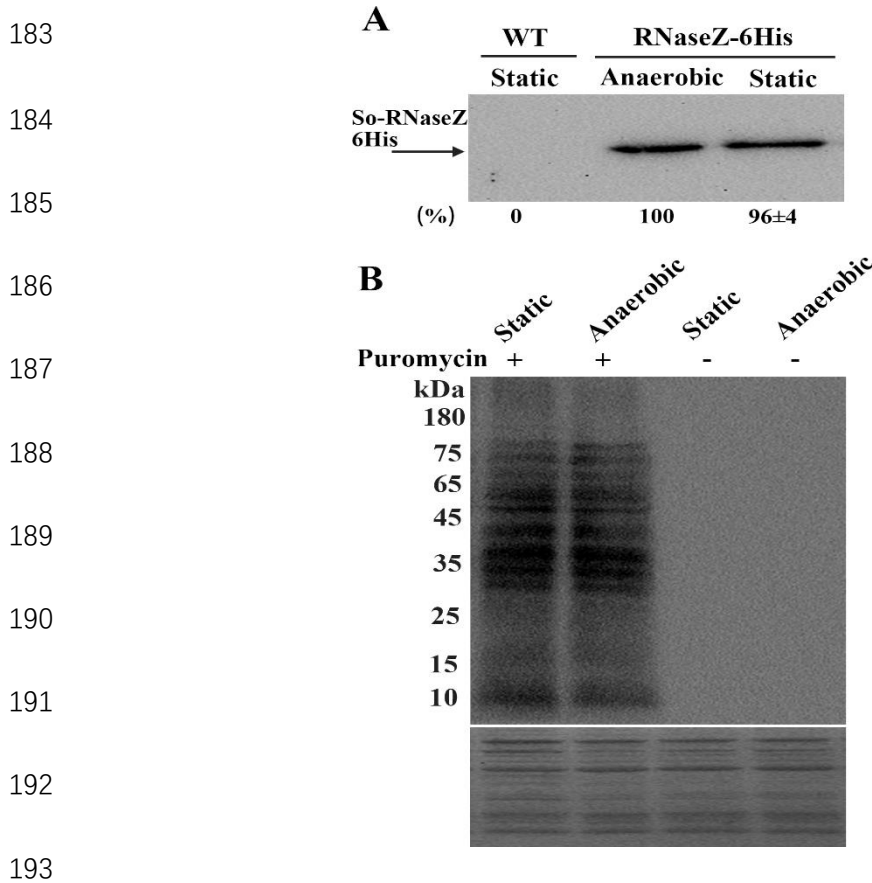

194 **Fig. S11. Comparison of So-RNaseZ abundance (A) and protein synthesis (B) of**  
 195 **the statically and anaerobically grown *S. oligofermentans*.** A. Western blot assayed  
 196 the So-RNaseZ abundance in RNaseZ-6His cells. Early mid-exponential cells of  
 197 statically or anaerobically grown RNaseZ-6His were collected and lysed. Same  
 198 amounts of total cell protein were loaded on 12% SDS-PAGE gels, and the So-RNaseZ  
 199 abundance was examined by western blot using anti-His antibody. Cell lysate from  
 200 statically grown wild-type (WT) cells was included as a control. Western blot signal  
 201 intensities of the So-RNaseZ protein were measured using Image J, and expressed as  
 202 the percentages of anaerobic culture. Triplicate experiments were performed, and  
 203 averages  $\pm$  SD are shown below one representative image. B. Strain RNaseZ-6His was  
 204 cultured as described in A, and puromycin was added 10 min before cell collection.

205 Western blot assayed puromycin integration using the anti-puromycin antibody (upper  
206 panel), and same contents of total proteins were run on 12% SDS-PAGE gels and  
207 stained with Coomassie brilliant blue (lower panel). Molecular weight marker is shown  
208 at each gel left. Triplicate experiments were performed, and one representative result is  
209 shown.

210



211 **Table S1. Strains, plasmids and primers used in this study\***

| Strain, plasmid or primer | Characteristics and description                                                                                                                                        | Reference or sources             |
|---------------------------|------------------------------------------------------------------------------------------------------------------------------------------------------------------------|----------------------------------|
| <b>Strain</b>             |                                                                                                                                                                        |                                  |
| <i>E. coli</i>            |                                                                                                                                                                        |                                  |
| DH5 $\alpha$              | <i>supE44 lacU169</i> (80 <i>lacZ</i> M15) <i>hsdR17 recA1 endA1 gyrA96 thi-1 relA1 luxS</i>                                                                           | TransGen Biotech, Beijing, China |
| BL21 (DE3)                | F- <i>ompT hsdS</i> (rBB - mB -) gal dcm (DE3)                                                                                                                         | TransGen Biotech, Beijing, China |
| <i>S. oligofermentans</i> |                                                                                                                                                                        |                                  |
| Wild-type                 | WT, Kan <sup>r</sup> Sp <sup>r</sup>                                                                                                                                   | 1                                |
| RNaseZ-6His               | WT RNaseZ::6His; Kan <sup>r</sup> ; wild-type with RNaseZ fused with 6 $\times$ His tag at C-terminus                                                                  | This study                       |
| So-RNaseZcom              | WT RNaseZ::Kan; pDL278-SoRNaseZ6His; Kan <sup>r</sup> ; Sp <sup>r</sup> ; wild-type with So- <i>rnaseZ</i> deletion and carrying pDL278-SoRNaseZ6His plasmid           | This study                       |
| So-RNaseZC38Scom          | WT RNaseZ::Kan; pDL278-SoRNaseZC38S6His; Kan <sup>r</sup> ; Sp <sup>r</sup> ; wild-type with So- <i>rnaseZ</i> deletion and carrying pDL278-SoRNaseZC38S6His plasmid   | This study                       |
| So-RNaseZC149Scom         | WT RNaseZ::Kan; pDL278-SoRNaseZC149S6His; Kan <sup>r</sup> ; Sp <sup>r</sup> ; wild-type with So- <i>rnaseZ</i> deletion and carrying pDL278-SoRNaseZC149S6His plasmid | This study                       |
| So-RNaseZover             | WT pDL278- <i>Pldh</i> -SoRNaseZ6His; Sp <sup>r</sup> ; wild-type harboring pDL278 plasmid with So-RNaseZ6His driven by lactate dehydrogenase promoter                 | This study                       |
| pDL278RNaseZ-6His         | WT RNaseZ::6His; Kan <sup>r</sup> ; RNaseZ-6His strain carrying pDL278 plasmid                                                                                         | This study                       |
| <b>Plasmid</b>            |                                                                                                                                                                        |                                  |
| pALH124                   | Kan <sup>r</sup>                                                                                                                                                       | 2                                |
| pDL278                    | Sp <sup>r</sup>                                                                                                                                                        | 3                                |

|                              |                                                         |                                      |
|------------------------------|---------------------------------------------------------|--------------------------------------|
| pDL278-<br>SoRNaseZ6His      | pDL278 carrying SoRNaseZ6His; Sp <sup>r</sup>           | This study                           |
| pDL278-<br>SoRNaseZC38S6His  | pDL278 carrying SoRNaseZC38S6His; Sp <sup>r</sup>       | This study                           |
| pDL278-<br>SoRNaseZC149S6His | pDL278 carrying SoRNaseZC149S6His; Sp <sup>r</sup>      | This study                           |
| <b>Primer</b>                | <b>Sequence (5'-3')</b>                                 | <b>Purpose</b>                       |
| RNaseZ-6His upF              | CTGGTTCCCGTCTGCCTTATC                                   | RNaseZ-6His<br>construction          |
| RNaseZ-6His upR              | CTAAGGATCCCTAGTGGTGGTGGTGGTGG<br>TGTA ACTCCACCTCTTCCAAG | RNaseZ-6His<br>construction          |
| RNaseZ-6His dnF              | CTAAGGATCCTTTTCCAATTTAGGACAGTT<br>TC                    | RNaseZ-6His<br>construction          |
| RNaseZ-6His dnR              | GCTCCTTCCAACCAAAATCAGTCGG                               | RNaseZ-6His<br>construction          |
| GipDL278F                    | CACCACCACTAGTCTAGAGTCGACCTGCA<br>GG                     | So-RNaseZcom<br>construction         |
| GipDL278R                    | CAGAAAAGGAGAAATCACCTGGCCGTCG<br>TTTTAC                  | So-RNaseZcom<br>construction         |
| PoperonF                     | CGACGGCCAGGTGATTTCTCCTTTTCTGA<br>ACTTTTA                | So-RNaseZcom<br>construction         |
| PoperonR                     | GTAATTGCATCTTTTTTCTTGAAAAAATT<br>TTAATTTTTC             | So-RNaseZcom<br>construction         |
| <i>rnz-comF</i>              | AGGAAAAAAGATGCAATTACAATTTTGTAG<br>GAACCG                | So-RNaseZcom<br>construction         |
| <i>rnz-comR</i>              | GGTCGACTCTAGACTAGTGGTGGTGGTGG<br>TGGTGTA ACTCCACCTCTTC  | So-RNaseZcom<br>construction         |
| <i>rnz-deleteupF</i>         | GATTTGGCCCTGAAATACGGCGG                                 | So-RNaseZcom<br>construction         |
| <i>rnz-deleteupR</i>         | CCTAGGATCCGTAATTGCATGTTATTCTTTC<br>TAAATG               | So-RNaseZcom<br>construction         |
| <i>rnz-deletedownF</i>       | GGAGGATCCGGAGTTATAGTTTTCCAATTT<br>AG                    | So-RNaseZcom<br>construction         |
| <i>rnz-deletedownR</i>       | CAGTCGGTCATGGGGCAAGAGC                                  | So-RNaseZcom<br>construction         |
| <i>rnzC38SF</i>              | GGTCTGGATGTTTGATTCCGGTGAAGGTA<br>CCCAG                  | So-<br>RNaseZC38Scom<br>construction |
| <i>rnzC38SR</i>              | CTGGGTACCTTCACCGGAATCAAACATCC<br>AGACC                  | So-<br>RNaseZC38Scom<br>construction |
| <i>rnzC149SF</i>             | GCTAGACCACACGATTTTCTCTGTGGGTTA<br>TCGGGTCATGC           | So-<br>RNaseZC149Scom                |

---

|                       |                                                            |                                                                              |
|-----------------------|------------------------------------------------------------|------------------------------------------------------------------------------|
|                       |                                                            | m construction                                                               |
| <i>rnzC149SR</i>      | GCATGACCCGATAACCCACAGAGAAAATC<br>GTGTGGTCTAGC              | So-<br>RNaseZC149S<br>m construction                                         |
| PLDHF                 | CCGGAATTCTAAAAAATGCCTCGTTTCAAT<br>ATTAAATC                 | So-RNaseZover<br>construction                                                |
| PLDHR                 | CCGGTTCCTAAAAATTGTAATTGCATTTCT<br>AAACATCTCCTTATTATTTTATAG | So-RNaseZover<br>construction                                                |
| Pldh- <i>rnzoverF</i> | CTAAAAATAATAAGGAGATGTTTAGAAAT<br>GCAATTACAATTTTTAGGAACCGG  | So-RNaseZover<br>construction                                                |
| Pldh- <i>rnzoverR</i> | ACGCGTCGACCTAGTGGTGGTGGTGGTGG<br>TGTAACTCCACCTCTTCC        | So-RNaseZover<br>construction                                                |
| TransArgF             | TAATACGACTCACTATAGGGAGAATGAAA<br>AGGTATCGGTCTC             | <i>In vitro</i><br>transcription for<br>RNaseZ activity                      |
| TransArgR             | CTTACAAGATCTATTATAAATAAAATTTTC                             | <i>In vitro</i><br>transcription for<br>RNaseZ activity                      |
| TransAlaF             | TAATACGACTCACTATAGGGGGGGCCTTA<br>GCTCAG                    | <i>In vitro</i><br>transcription for<br>RNaseZ activity<br>and Northern blot |
| TransAlaR             | CAATTTTCAATGGACAAGTTTAGAATAGTC                             | <i>In vitro</i><br>transcription for<br>RNaseZ activity                      |
| Northern AlaR         | GTTTATTTTCTTGTTACTATTTGATATAGTT<br>ATTC                    | <i>In vitro</i><br>transcription for<br>Northern blot                        |
| TransProF             | TAATACGACTCACTATAGGGCGGGAAGTA<br>GCTCAG                    | <i>In vitro</i><br>transcription for<br>RNaseZ activity                      |
| TransProR             | CAAAAAACGGCTCCAGCCGTTATTTAAA<br>TAC                        | <i>In vitro</i><br>transcription for<br>RNaseZ activity                      |
| TransLeuF             | TAATACGACTCACTATAGGGGCGGAGGTG<br>GTGGAACGG                 | <i>In vitro</i><br>transcription for<br>RNaseZ activity                      |
| TransLeuR             | CAAAGAAAACTCTTGTCAACTTG                                    | <i>In vitro</i><br>transcription for<br>RNaseZ activity                      |
| TransMetF             | TAATACGACTCACTATAGGGCGCGGGATG<br>GAGCAGCTAG                | <i>In vitro</i><br>transcription for<br>RNaseZ activity                      |

---

|                              |                                                                                                 |                                                |
|------------------------------|-------------------------------------------------------------------------------------------------|------------------------------------------------|
| TransMetR                    | GACACATGGAGCTTCAATCC                                                                            | In vitro transcription for RNaseZ activity     |
| Ala probe                    | 5'-biotin-<br>CGAACCGCTGACCTCCTGCGTGCAAAGCA<br>GGCGCTCTCCCAG                                    | Mature tRNA <sup>Ala</sup><br>Northern blot    |
| Pro probe                    | 5'-biotin-<br>CCTGCGACACCTTGGTCCCAAACCAAGT<br>ACTCTACCAAGCTGAGCTACTTCCCG                        | Mature tRNA <sup>Pro</sup><br>Northern blot    |
| Leu probe                    | 5'-biotin-<br>GATTTGAACCCTCACACCCGTACGGGCAC<br>ATGCGCCTGAAGCATGCGTGTCT                          | Mature tRNA <sup>Leu</sup><br>Northern blot    |
| pretRNA <sup>Ala</sup> probe | 5'-biotin-<br>CTATTTGATATAGTTATTCAATTTTCAATGG<br>ACAAGTTTAGAATAG                                | tRNA <sup>Ala</sup> precursor<br>Northern blot |
| pretRNA <sup>Pro</sup> probe | 5'-biotin-<br>AAAAAAACGGCTCCAGCCGTTATTTAAAT<br>ACAGTAATGATTAGAAAATTCTAAACCAA<br>CAATATA         | tRNA <sup>Pro</sup> precursor<br>Northern blot |
| pretRNA <sup>Leu</sup> probe | 5'-biotin-<br>CATAATTTTTCAAAGAAAACTCTTGTC<br>AACTTGGACAAGAGTTCCTGTTCGA                          | tRNA <sup>Leu</sup> precursor<br>Northern blot |
| 5S rRNA probe                | 5'-biotin-<br>CACAGGGGGCAACCCCAACTACTTCCGG<br>CGTTCTAGGGCTTAACTTCTGTGTTCCGCA<br>TGGGTACAGGTGTAT | 5S rRNA<br>Northern blot                       |
| Ala3RACEF                    | GGGGCCTTAGCTCAGCTGGG                                                                            | tRNA <sup>Ala</sup> 3' race                    |
| Ala3RACER                    | ATTGATGGTGCCTACAG                                                                               | tRNA <sup>Ala</sup> 3' race                    |
| Ala5RACEF                    | CAGACTGGATCCGTCCTC                                                                              | tRNA <sup>Ala</sup> 5' race                    |
| Ala5RACER                    | CAATTTTCAATGGACAAGTTTAGAATAGTC                                                                  | tRNA <sup>Ala</sup> 5' race                    |

212 \*: Kan, kanamycin; Sp, spectinomycin; r, resistant; s, sensitive.

213 *Italic nucleotide bases indicate restriction enzyme digestion sites.*

214

215 **References**

- 216 1. Tong H, Gao X, Dong X. 2003. *Streptococcus oligofermentans* sp. nov., a novel  
217 oral isolate from caries-free humans. *Int J Syst Evol Microbiol* 53:1101-1104.
- 218 2. Liu Y, Zeng L, Burne RA. 2009. AguR is required for induction of the  
219 *Streptococcus mutans* agmatine deiminase system by low pH and agmatine.  
220 *Appl Environ Microbiol* 75:2629-2637.
- 221 3. LeBlanc DJ, Lee LN, Abu-Al-Jaibat A. 1992. Molecular, genetic, and functional  
222 analysis of the basic replicon of pVA380-1, a plasmid of oral streptococcal  
223 origin. *Plasmid* 28:130-145.
